# Supplementary material
Source: MDPI journal article supplement (https://www.mdpi.com/1424-2818/12/10/386)
Supplement: s1 [file s1]

## Sheet: Table S2
Table S2. CO1 sequence divergence (%) among taxa, calculated using the Maximum Composite Likelihood model [29] in MEGA X [15].
Table S2. CO1 sequence divergence (%) among taxa, calculated using the Maximum Composite Likelihood model [29] in MEGA X [15].
		Taxon 1A	Taxon 1I	Taxon 1O	Taxon 1J	sp. 52	Taxon 2B	Taxon 2A	Taxon 35A	Taxon 1D	Taxon 2D	sp. 46	Taxon 1G	Taxon 1R	Taxon 1H	Taxon 1C	Taxon 1E	Taxon 1F	Taxon 2C	Taxon 1S	Taxon 1M	Taxon 1P	Taxon 1N	Taxon 1Q	Taxon 1B	Taxon 1K	Taxon 1L	sp. 45	Taxon 35B	Taxon 35C	sp. 62	Taxon 1T
Taxon 1A
Taxon 1I		0.0957182
Taxon 1O		0.0834416	0.0564157
Taxon 1J		0.094767	0.0221381	0.0621793
sp. 52		0.101561	0.0397244	0.0626159	0.0373601
Taxon 2B		0.100829	0.0984346	0.0998537	0.104193	0.121185
Taxon 2A		0.090636	0.103724	0.112311	0.109278	0.113274	0.0376375
Taxon 35A		0.115851	0.139023	0.136008	0.145307	0.148307	0.12186	0.130855
Taxon 1D		0.03266	0.100426	0.0874703	0.092632	0.101765	0.0982927	0.098539	0.112731
Taxon 2D		0.0941221	0.116486	0.103942	0.110639	0.114926	0.0402175	0.0455065	0.118338	0.0903966
sp. 46		0.0723395	0.117212	0.107726	0.115542	0.111521	0.115144	0.102142	0.118135	0.0674755	0.100352
Taxon 1G		0.0688624	0.106394	0.099001	0.100396	0.0988504	0.104901	0.100135	0.11553	0.0570713	0.0923443	0.0365589
Taxo 1R		0.1136	0.0766815	0.0696624	0.0786837	0.0724375	0.128909	0.133411	0.166137	0.112607	0.122496	0.122285	0.10049
Taxon 1H		0.0696632	0.111725	0.0993867	0.11535	0.113396	0.111621	0.10241	0.118256	0.061615	0.0985072	0.0386957	0.034957	0.11588
Taxon 1C		0.0360019	0.110337	0.0941043	0.102491	0.104504	0.101415	0.0954561	0.120686	0.0288311	0.0926989	0.0821659	0.0715662	0.116647	0.0775658
Taxon 1E		0.0445926	0.109008	0.10184	0.0985431	0.106647	0.105384	0.105031	0.123325	0.0431408	0.0982407	0.0864692	0.0780082	0.12441	0.0854766	0.0421258
Taxon 1F		0.0418975	0.108264	0.0968729	0.105658	0.105627	0.109289	0.108903	0.123576	0.040861	0.0923034	0.0763725	0.0659673	0.122494	0.075423	0.0467139	0.0433443
Taxon 2C		0.0962828	0.12154	0.109566	0.128277	0.130222	0.0419596	0.0476671	0.126546	0.093182	0.0364939	0.104043	0.104815	0.133765	0.106012	0.0883619	0.108029	0.10457
Taxon 1S		0.114031	0.0853283	0.0769951	0.0879064	0.0824036	0.124568	0.136136	0.161659	0.114734	0.120146	0.121711	0.101311	0.0416103	0.116533	0.119733	0.123931	0.119247	0.123573
Taxon 1M		0.0981804	0.0438843	0.0598633	0.0481758	0.043765	0.100349	0.10307	0.139519	0.0983467	0.104463	0.108806	0.10141	0.0760919	0.10502	0.107733	0.115902	0.115185	0.114642	0.0841165
Taxon 1P		0.0920355	0.0653137	0.0454918	0.0671499	0.0659531	0.107633	0.118632	0.142479	0.097905	0.100868	0.105762	0.0919976	0.0701248	0.0998252	0.0997817	0.103393	0.0961467	0.124326	0.0786966	0.0727149
Taxon 1N		0.0880382	0.052439	0.0584274	0.0516134	0.046515	0.100822	0.103251	0.143637	0.0889683	0.0982461	0.0986594	0.0934098	0.0668843	0.098184	0.0952734	0.101675	0.0980595	0.115301	0.0846251	0.0393968	0.0675521
Taxon 1Q		0.0882694	0.0706018	0.0368584	0.0653961	0.0676711	0.119023	0.12911	0.144024	0.0930146	0.118563	0.116435	0.101562	0.0733289	0.109049	0.10119	0.108621	0.101286	0.12988	0.0788558	0.074937	0.0278507	0.0781088
Taxon 1B		0.0219782	0.146473	0.103823	0.106897	0.114621	0.10093	0.119977	0.115846	0.0104988	0.0833716	0.0539483	0.038428	0.114847	0.064863	0.0135924	0.0309948	0.0207558	0.126962	0.124792	0.122685	0.0949013	0.104628	0.106201
Taxon 1K		0.0914623	0.0301277	0.0544104	0.0340169	0.0261804	0.106472	0.106398	0.141724	0.0964023	0.110171	0.113285	0.104086	0.0745462	0.104759	0.101563	0.109614	0.10524	0.123634	0.0865147	0.0465	0.0642568	0.0431773	0.0659359	0.108083
Taxon 1L		0.0975512	0.0335891	0.0639227	0.0412447	0.0333133	0.115479	0.112136	0.155633	0.10276	0.117098	0.121801	0.107643	0.0777576	0.118733	0.105032	0.107333	0.107475	0.130185	0.0866383	0.0502769	0.06914	0.0543492	0.0749429	0.11148	0.0288387
sp. 45		0.0886473	0.118717	0.108686	0.124982	0.129285	0.0355711	0.0473507	0.118189	0.0883312	0.0355962	0.100368	0.100112	0.140819	0.10262	0.0868	0.0944769	0.093535	0.00925293	0.131967	0.111505	0.118296	0.111317	0.128463	0.0891741	0.121933	0.126601
Taxon 35B		0.107994	0.139838	0.136054	0.141038	0.14036	0.123264	0.128491	0.0389842	0.104289	0.112183	0.105907	0.100856	0.157624	0.106416	0.109403	0.112593	0.105613	0.117802	0.156847	0.138534	0.139836	0.126839	0.1424	0.0904053	0.138739	0.14732	0.118953
Taxon 35C		0.0988595	0.118886	0.113063	0.11119	0.118143	0.114982	0.11258	0.108842	0.101044	0.103187	0.122193	0.108535	0.116293	0.112847	0.0959125	0.10755	0.102806	0.118642	0.126755	0.123764	0.114831	0.108715	0.113982	0.0857064	0.108372	0.116322	0.116057	0.0883288
sp. 62		0.10132	0.130333	0.116125	0.114584	0.122667	0.0457825	0.0502188	0.121568	0.0983874	0.0243511	0.104055	0.0928923	0.130101	0.101725	0.0979053	0.102186	0.0980109	0.0407294	0.126208	0.116034	0.119123	0.111551	0.131374	0.0968578	0.113059	0.12813	0.0462842	0.120472	0.108813
Taxon 1T		0.101125	0.0679566	0.0662509	0.0694334	0.0668435	0.116094	0.126054	0.136316	0.107734	0.126566	0.123323	0.116265	0.0682182	0.113159	0.1169	0.120325	0.124178	0.123306	0.0683236	0.0681556	0.0836111	0.0708814	0.0766317	0.211975	0.0713864	0.0731366	0.12543	0.133289	0.124267	0.157602
